# Supplementary material for: Genetic evidence implicating natriuretic peptide receptor-3 in cardiovascular disease risk: a Mendelian randomization study
Source: PubMed Central journal article supplement (PMC10134514; doi:10.1186/s12916-023-02867-x), 2023-04-26
Supplement: 12916_2023_2867_MOESM1_ESM.pdf [file 12916_2023_2867_MOESM1_ESM.pdf]

**SUPPLEMENTAL TABLES**

**Table S1.** Instrument SNPs used for NPR2- and NPR3-predicted height

| SNP                                          | Location   | EA | EAF  | GX     | GX SE | P      | N         | R <sup>2</sup> | F    |
|----------------------------------------------|------------|----|------|--------|-------|--------|-----------|----------------|------|
| <b>Natriuretic peptide receptor 2 (NPR2)</b> |            |    |      |        |       |        |           |                |      |
| rs867194                                     | 9:35705086 | G  | 0.25 | 0.010  | 0.001 | 3E-21  | 2,083,833 | 0.00004        | 83   |
| rs7847621                                    | 9:35780220 | G  | 0.63 | 0.016  | 0.001 | 4E-57  | 2,018,522 | 0.00011        | 231  |
| rs4879930                                    | 9:35825413 | T  | 0.68 | -0.009 | 0.001 | 1E-16  | 2,083,871 | 0.00003        | 67   |
| rs12000024                                   | 9:35892051 | G  | 0.22 | 0.010  | 0.001 | 2E-19  | 2,082,607 | 0.00003        | 73   |
| <b>Natriuretic peptide receptor 3 (NPR3)</b> |            |    |      |        |       |        |           |                |      |
| rs1471154                                    | 5:32600297 | C  | 0.84 | 0.010  | 0.001 | 3E-13  | 2,066,029 | 0.00003        | 54   |
| rs16890002                                   | 5:32638711 | C  | 0.07 | -0.013 | 0.002 | 1E-10  | 1,958,567 | 0.00002        | 42   |
| rs17540044                                   | 5:32692238 | C  | 0.23 | 0.028  | 0.001 | 2E-129 | 1,859,407 | 0.00028        | 523  |
| rs976576                                     | 5:32722499 | C  | 0.68 | -0.007 | 0.001 | 2E-10  | 2,084,661 | 0.00002        | 40   |
| rs696831                                     | 5:32725531 | A  | 0.27 | -0.008 | 0.001 | 3E-08  | 1,559,316 | 0.00002        | 35   |
| rs1060559                                    | 5:32735408 | T  | 0.10 | 0.017  | 0.002 | 5E-26  | 2,080,277 | 0.00005        | 101  |
| rs3792752                                    | 5:32768634 | G  | 0.27 | 0.031  | 0.001 | 3E-185 | 2,084,657 | 0.00037        | 766  |
| rs1173771                                    | 5:32815028 | G  | 0.61 | -0.034 | 0.001 | 3E-280 | 2,084,650 | 0.00056        | 1160 |
| rs9292469                                    | 5:32840210 | T  | 0.35 | -0.008 | 0.001 | 1E-15  | 2,083,376 | 0.00003        | 59   |
| rs7722828                                    | 5:32843434 | T  | 0.07 | 0.023  | 0.002 | 6E-37  | 2,083,729 | 0.00007        | 147  |
| rs1472261                                    | 5:32887610 | A  | 0.14 | -0.009 | 0.001 | 8E-10  | 2,084,661 | 0.00002        | 36   |
| rs2331101                                    | 5:32889284 | T  | 0.27 | -0.015 | 0.001 | 8E-48  | 2,081,059 | 0.00009        | 194  |

EA(F): effect allele (frequency), F statistic: a product of the size and precision of the genetic association [ $R^2 \times (N-2) / (1-R^2)$ ], GX: standard deviation unit difference in height (cm) per effect allele; GX SE: standard error of GX, R<sup>2</sup>: the proportion of the variance in height explained by the SNP [ $2 \times EAF \times (1-EAF) \times GX^2$ ], SNP: single-nucleotide polymorphism. Estimates ascertained from Yengo *et al.* (2022).

**Table S2.** Mendelian randomization results of genome-wide, NPR2-, and NPR3-predicted height on cardiovascular disease risk, risk factors and comorbidities

| <b>Outcome</b> | <b>Estimate unit</b> | <b>Exposure</b> | <b>Effect estimate (95%CI)</b> | <b>P</b> |
|----------------|----------------------|-----------------|--------------------------------|----------|
| <b>CAD</b>     | OR per SD            | Height          | 0.882 (0.868; 0.895)           | 7.2E-65  |
|                |                      | NPR2            | 0.768 (0.334; 1.768)           | 5.4E-01  |
|                |                      | NPR3            | 0.745 (0.601; 0.924)           | 7.0E-03  |
| <b>HF</b>      | OR per SD            | Height          | 1.03 (1.012; 1.048)            | 1.0E-03  |
|                |                      | NPR2            | 1.178 (0.228; 6.086)           | 8.5E-01  |
|                |                      | NPR3            | 0.772 (0.584; 1.02)            | 6.9E-02  |
| <b>Stroke</b>  | OR per SD            | Height          | 0.969 (0.956; 0.981)           | 6.3E-06  |
|                |                      | NPR2            | 0.829 (0.467; 1.471)           | 5.2E-01  |
|                |                      | NPR3            | 0.692 (0.503; 0.953)           | 2.4E-02  |
| <b>CVD</b>     | OR per SD            | Height          | 0.958 (0.877; 1.047)           | 3.5E-01  |
|                |                      | NPR2            | 0.832 (0.528; 1.311)           | 4.3E-01  |
|                |                      | NPR3            | 0.741 (0.637; 0.861)           | 1.0E-04  |
| <b>T2DM</b>    | OR per SD            | Height          | 0.96 (0.944; 0.977)            | 6.8E-06  |
|                |                      | NPR2            | 0.603 (0.216; 1.685)           | 3.4E-01  |
|                |                      | NPR3            | 0.857 (0.718; 1.024)           | 9.0E-02  |
| <b>CKD</b>     | OR per SD            | Height          | 1.073 (1.052; 1.093)           | 9.3E-12  |
|                |                      | NPR2            | 1.043 (0.501; 2.175)           | 9.1E-01  |
|                |                      | NPR3            | 0.893 (0.671; 1.189)           | 4.4E-01  |
| <b>SBP</b>     | Change per SD        | Height          | -0.04 (-0.047; -0.033)         | 6.6E-22  |
|                |                      | NPR2            | -0.026 (-0.326; 0.275)         | 8.7E-01  |
|                |                      | NPR3            | -0.546 (-0.886; -0.206)        | 2.0E-03  |
| <b>DBP</b>     | Change per SD        | Height          | -0.02 (-0.027; -0.012)         | 8.4E-07  |
|                |                      | NPR2            | -0.141 (-0.709; 0.427)         | 6.3E-01  |
|                |                      | NPR3            | -0.442 (-0.752; -0.131)        | 5.0E-03  |
| <b>LDL-C</b>   | Change per SD        | Height          | -0.062 (-0.07; -0.054)         | 5.9E-49  |
|                |                      | NPR2            | 0.026 (-0.183; 0.235)          | 8.1E-01  |
|                |                      | NPR3            | 0.025 (-0.019; 0.069)          | 2.7E-01  |
| <b>HDL-C</b>   | Change per SD        | Height          | -0.008 (-0.016; 0.000)         | 4.3E-02  |
|                |                      | NPR2            | -0.273 (-0.404; -0.142)        | 5.4E-05  |
|                |                      | NPR3            | -0.034 (-0.088; 0.020)         | 2.1E-01  |
| <b>TG</b>      | Change per SD        | Height          | -0.044 (-0.052; -0.037)        | 5.2E-26  |

|      |                      |         |
|------|----------------------|---------|
| NPR2 | 0.245 (0.122; 0.367) | 8.9E-05 |
| NPR3 | 0.060 (0.010; 0.110) | 1.8E-02 |

---

CAD: coronary artery disease, CI: confidence interval, CKD: chronic kidney disease, CVD: cardiovascular disease (reflects a pooled CAD, heart failure and stroke effect estimate), DBP: diastolic blood pressure, HDL-C: high-density lipoprotein cholesterol, HF: heart failure, LDL-C: low-density lipoprotein cholesterol, NPR2: natriuretic peptide receptor 2, NPR3: natriuretic peptide receptor 3, OR: odds ratio, SBP: systolic blood pressure, SD: standard deviation, T2DM: type-2 diabetes mellitus, TG: triglycerides.

**Table S3.** Instrument SNPs used for NPR3-predicted systolic blood pressure

| SNP                                          | Location   | EA | EAF  | GX     | GX SE | P     | N       | R <sup>2</sup> | F   |
|----------------------------------------------|------------|----|------|--------|-------|-------|---------|----------------|-----|
| <b>Natriuretic peptide receptor 3 (NPR3)</b> |            |    |      |        |       |       |         |                |     |
| rs17540044                                   | 5:32692238 | G  | 0.74 | -0.018 | 0.003 | 8E-13 | 475,633 | 0.00013        | 62  |
| rs1847018                                    | 5:32714661 | C  | 0.88 | -0.023 | 0.003 | 1E-11 | 475,633 | 0.00012        | 55  |
| rs7733331                                    | 5:32828846 | T  | 0.42 | 0.033  | 0.002 | 1E-47 | 475,633 | 0.00053        | 253 |
| rs9292470                                    | 5:32872980 | G  | 0.73 | 0.017  | 0.003 | 1E-11 | 475,633 | 0.00012        | 55  |

EA(F): effect allele (frequency), F statistic: a product of the size and precision of the genetic association [ $R^2 \times (N-2) / (1-R^2)$ ], GX: standard deviation unit difference in systolic blood pressure (standard deviation units) per effect allele; GX SE: standard error of GX, R<sup>2</sup>: the proportion of the variance in systolic blood pressure explained by the SNP [ $2 \times EAF \times (1-EAF) \times GX^2$ ], SNP: single-nucleotide polymorphism. Estimates ascertained from the Neale Lab (<http://www.nealelab.is/uk-biobank/>).

**Table S4.** Mendelian randomization results of genome-wide and NPR3-predicted SBP on cardiovascular disease risk

| <b>Outcome</b>       | <b>Exposure</b> | <b>Odds ratio (95% CI)<br/>per SD change in SBP</b> | <b>P</b> |
|----------------------|-----------------|-----------------------------------------------------|----------|
| <b>CAD</b>           | SBP             | 0.562 (0.513; 0.616)                                | 8.9E-32  |
|                      | NPR3            | 0.681 (0.555; 0.836)                                | 2.8E-04  |
| <b>Heart failure</b> | SBP             | 0.705 (0.657; 0.757)                                | 1.0E-20  |
|                      | NPR3            | 0.816 (0.500; 1.331)                                | 4.2E-01  |
| <b>Stroke</b>        | SBP             | 0.651 (0.608; 0.696)                                | 1.5E-33  |
|                      | NPR3            | 0.452 (0.347; 0.587)                                | 6.2E-09  |
| <b>CVD</b>           | SBP             | 0.641 (0.561; 0.725)                                | 3.5E-11  |
|                      | NPR3            | 0.511 (0.439; 0.852)                                | 3.7E-03  |

CAD: coronary artery disease, CI: confidence interval, CVD: cardiovascular disease (reflects a pooled CAD, heart failure and stroke effect estimate), NPR3: natriuretic peptide receptor 3, SBP: systolic blood pressure.

**Table S5.** Colocalization results for the genetic associations between NPR2- and NPR3-predicted height and cardiovascular disease risk and risk factors

| Exposure | Outcome | SNPs | Posterior probability of causal variant hypotheses (PPH) |             |            |             |         | Lead SNP  |
|----------|---------|------|----------------------------------------------------------|-------------|------------|-------------|---------|-----------|
|          |         |      | 0: None                                                  | 1: Exposure | 2: Outcome | 3: Distinct | 4: Both |           |
| NPR2     | HDL-C   | 98   | <0.01                                                    | 0.04        | <0.01      | 0.10        | 0.86    | rs7847621 |
| NPR2     | TG      | 98   | <0.01                                                    | 0.25        | <0.01      | <0.01       | 0.75    | rs7847621 |
| NPR3     | SBP     | 152  | <0.01                                                    | <0.01       | <0.01      | 0.01        | 0.99    | rs1173771 |
| NPR3     | DBP     | 152  | <0.01                                                    | <0.01       | <0.01      | <0.01       | >0.99   | rs1173771 |
| NPR3     | TG      | 153  | <0.01                                                    | >0.99       | <0.01      | <0.01       | <0.01   | rs1173771 |
| NPR3     | CAD     | 153  | <0.01                                                    | 0.50        | <0.01      | 0.01        | 0.49    | rs1173771 |
| NPR3     | Stroke  | 153  | <0.01                                                    | <0.01       | <0.01      | <0.01       | 0.99    | rs1173771 |

Posterior probabilities of the following hypotheses are tested: **0**: no variants are causal; **1**: causal variant for exposure only; **2**: causal variant for outcome only; **3**: distinct causal variants for exposure and outcome (i.e., MR results may be due to LD between separate causal variants for the traits); **4**: shared causal variant for exposure and outcome (PPH4 >0.5 reflects colocalization in support of the MR evidence). CAD: coronary artery disease, DBP: diastolic blood pressure, HDL-C: high-density lipoprotein cholesterol, SBP: systolic blood pressure, SNP: single-nucleotide polymorphism, TG: triglycerides

**Table S6.** Mendelian randomization statistical sensitivity analyses for the associations between NPR3-predicted height and cardiovascular disease risk and systolic blood pressure.

| Outcome              | Unit | Weighted Median      |         | MR-Egger             |         |               | I <sup>2</sup> (%) |
|----------------------|------|----------------------|---------|----------------------|---------|---------------|--------------------|
|                      |      | GY (95% CI)          | P       | GY (95% CI)          | P       | P (intercept) |                    |
| <b>CAD</b>           | OR   | 0.75 (0.6; 0.94)     | 1.1E-02 | 0.74 (0.48; 1.14)    | 1.7E-01 | 9.7E-01       | 46.5 (0.00; 72.6)  |
| <b>Heart failure</b> | OR   | 0.75 (0.53; 1.05)    | 9.7E-02 | 0.78 (0.45; 1.37)    | 3.9E-01 | 9.6E-01       | 0.00 (0.00; 58.3)  |
| <b>Stroke</b>        | OR   | 0.51 (0.36; 0.72)    | 1.8E-04 | 0.62 (0.33; 1.18)    | 1.5E-01 | 7.0E-01       | 64.0 (33.2; 80.6)  |
| <b>SBP</b>           | SD   | -0.71 (-0.87; -0.55) | 1.1E-17 | -0.71 (-1.36; -0.06) | 3.3E-02 | 6.0E-01       | 93.9 (91.0; 95.8)  |

Abbreviations: CAD: coronary artery disease, CI: confidence interval, OR: odds ratio, SBP: systolic blood pressure, SD: standard deviation. All estimates are given per 1-SD increase in NPR3-predicted height.
