# Supplementary material for: Genetic evidence implicating natriuretic peptide receptor-3 in cardiovascular disease risk: a Mendelian randomization study
Source: PubMed Central journal article supplement (PMC10134514; doi:10.1186/s12916-023-02867-x), 2023-04-26
Supplement: 12916_2023_2867_MOESM2_ESM.pdf [file 12916_2023_2867_MOESM2_ESM.pdf]

## SUPPLEMENTAL FIGURES

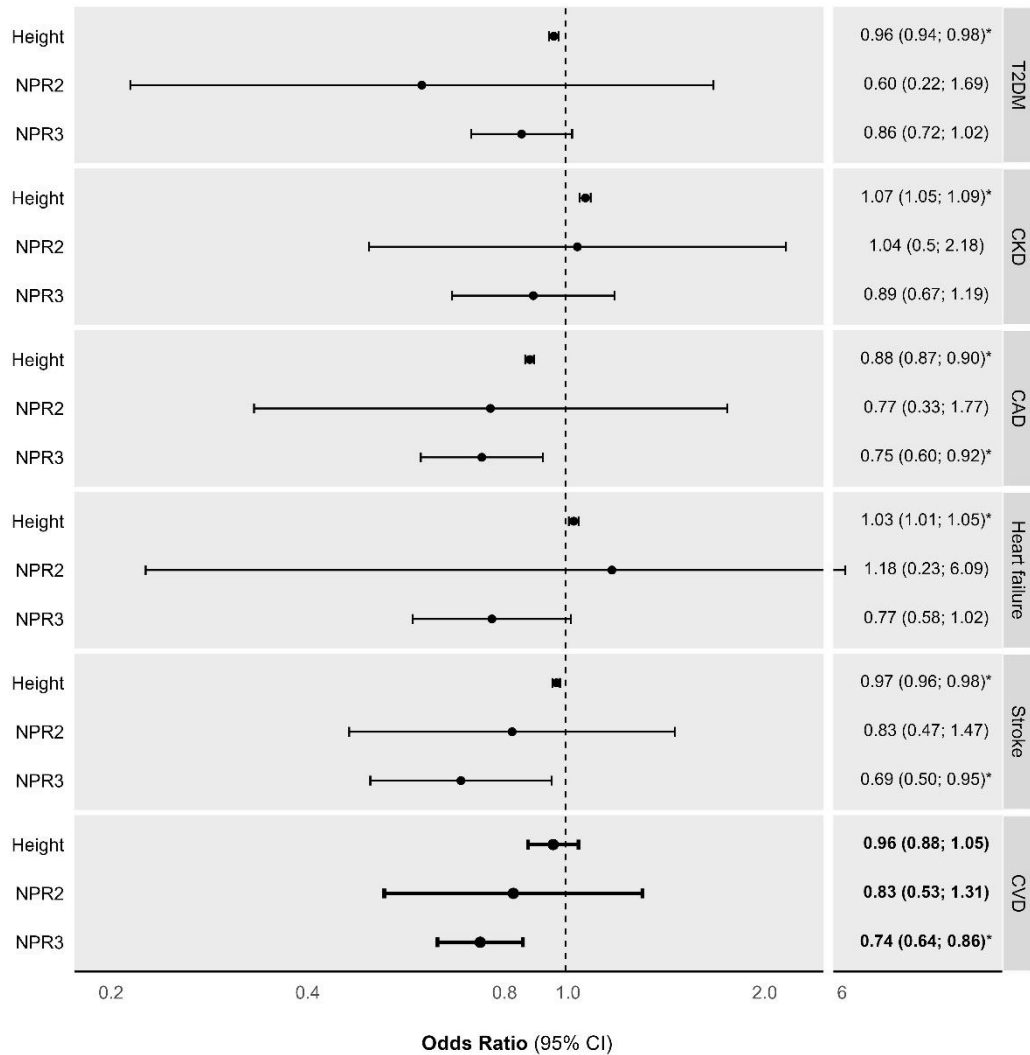

**Figure S1.** Mendelian randomization estimates of genome-wide, NPR3-, and NPR2-predicted height on T2DM, CKD, and CVD risk.

Effect estimates are scaled per standard deviation increased height (~9.2cm). \* denotes  $p < .05$ . CAD: coronary artery disease, CI: confidence interval, CKD: chronic kidney disease, CVD: cardiovascular disease (reflects a pooled CAD, heart failure and stroke estimate), NPR2: natriuretic peptide receptor 2, NPR3: natriuretic peptide receptor 3, T2DM: type-2 diabetes mellitus.

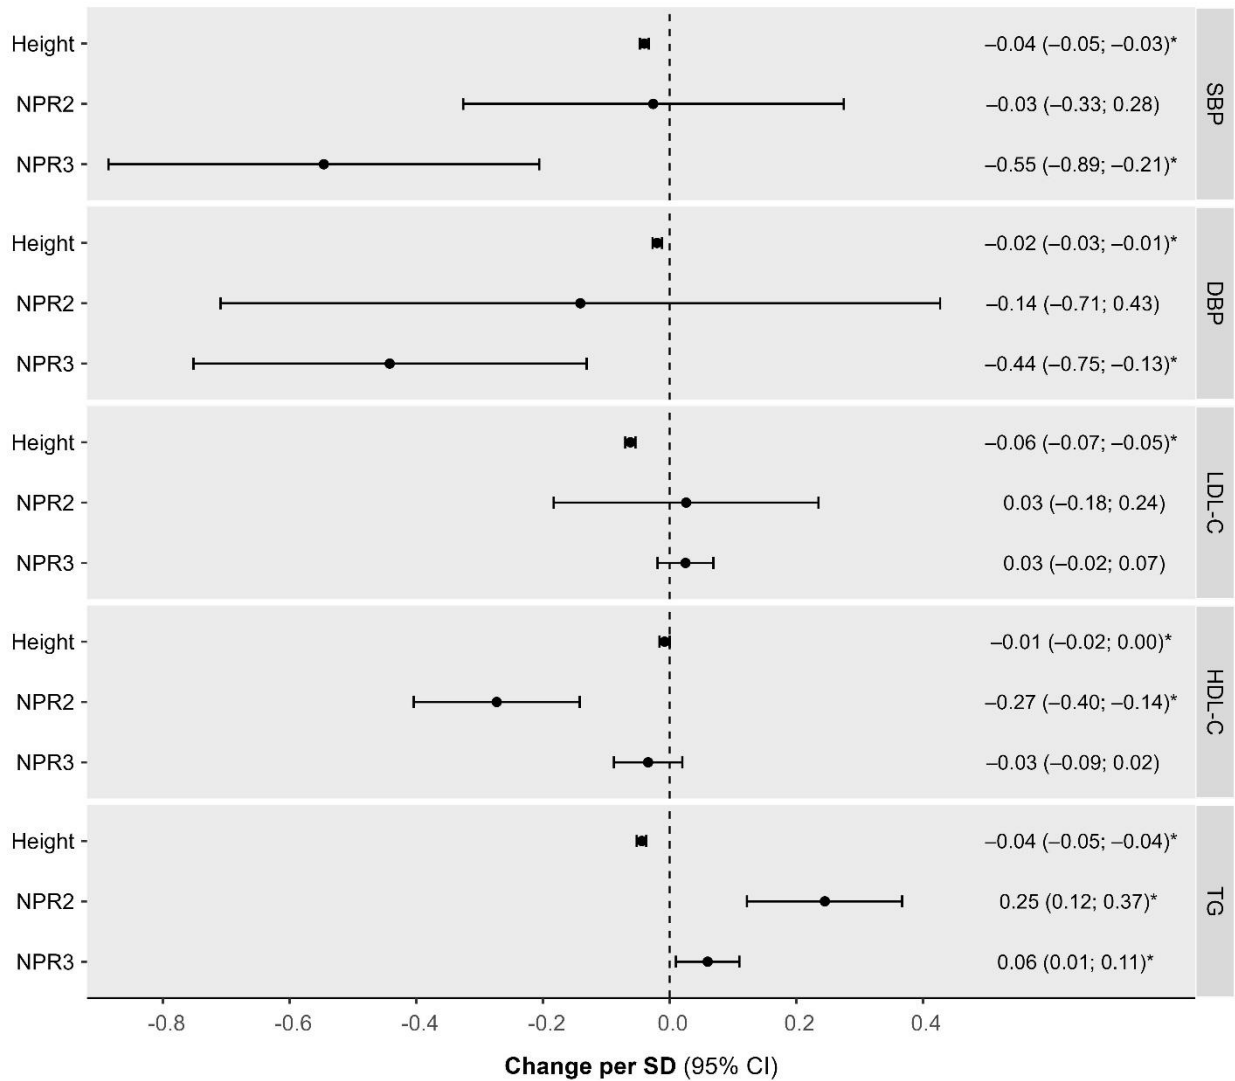

**Figure S2.** Mendelian randomization estimates of genome-wide, NPR3, and NPR2 predicted height on blood pressure and blood lipid traits.

Effect estimates are interpreted as standard deviation (SD) unit difference per 1-SD higher height (~9.2cm). \* denotes  $p < .05$ . CI: confidence interval, DBP: diastolic blood pressure, HDL-C: high-density lipoprotein cholesterol, LDL-C: low-density lipoprotein cholesterol, NPR2: natriuretic peptide receptor 2, NPR3: natriuretic peptide receptor 3, SBP: systolic blood pressure, SD: standard deviation, TG: triglycerides.

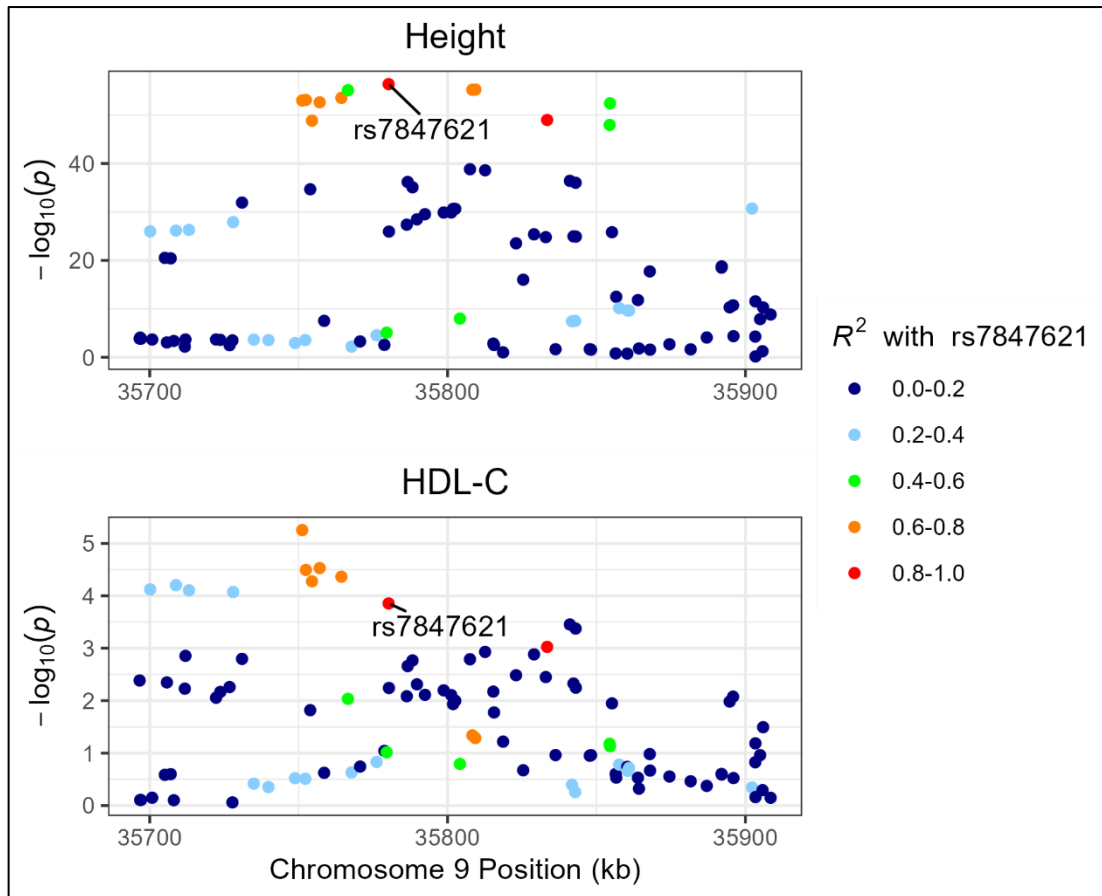

**Fig. S3.** Regional plot of the genetic associations of height (upper panel) and high-density lipoprotein cholesterol (HDL-C; lower panel) within +/-100kb of the *NPR2* gene.

The x-axis shows genomic position (build hg19) for each variant, and y-axis shows the  $-\log_{10}(\text{p-value})$  for the association. Colour denotes the linkage disequilibrium  $R^2$  with rs7847621, the most likely shared causal variant based on colocalization results.

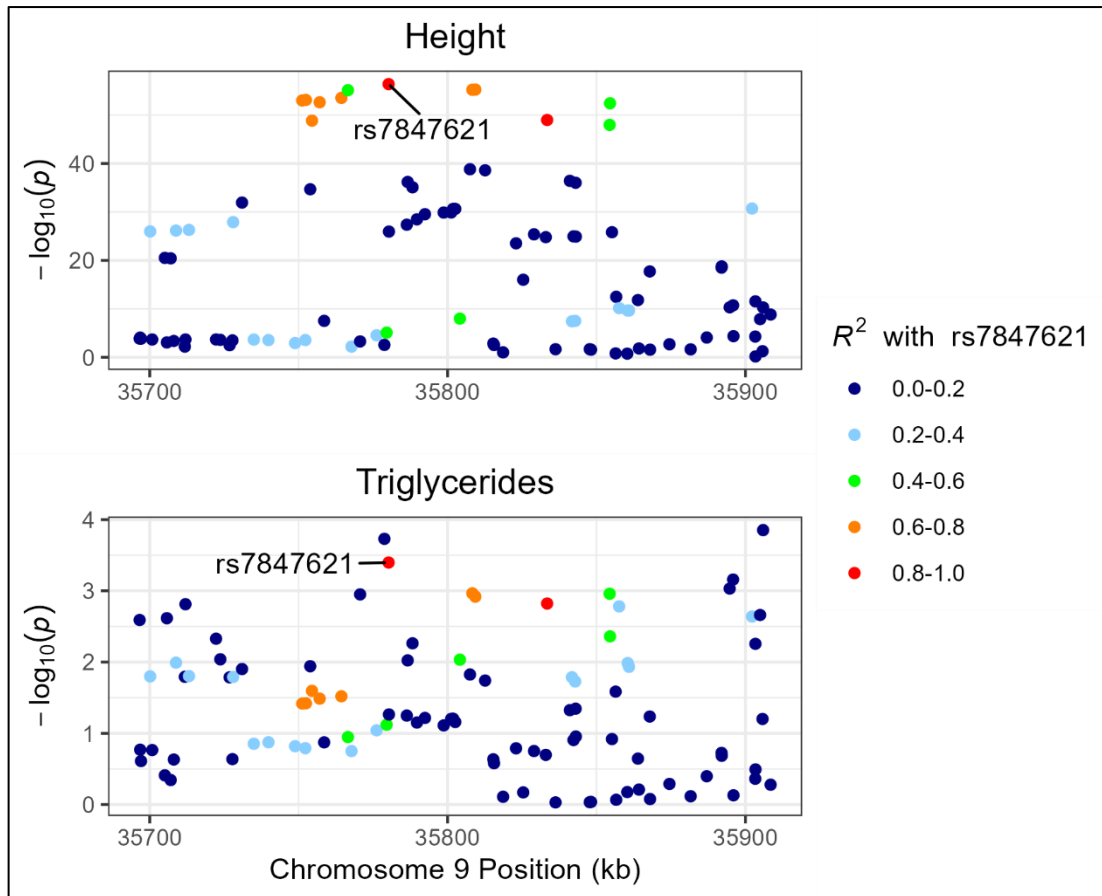

**Fig. S4.** Regional plot of the genetic associations of height (upper panel) and triglycerides (lower panel) within +/-100kb of the *NPR2* gene.

The x-axis shows genomic position (build hg19) for each variant, and y-axis shows the  $-\log_{10}(\text{p-value})$  for the association. Colour denotes the linkage disequilibrium  $R^2$  with rs7847621, the most likely shared causal variant based on colocalization results.

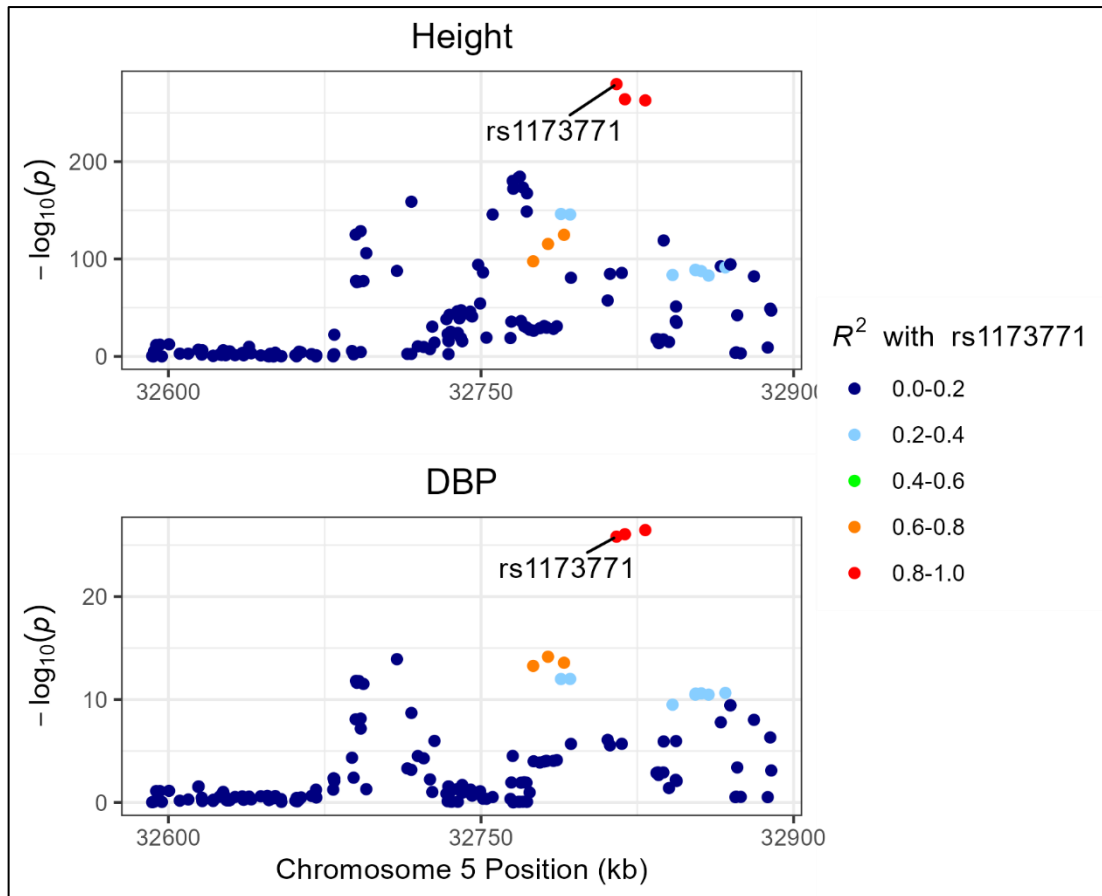

**Fig. S5.** Regional plot of the genetic associations of height (upper panel) and diastolic blood pressure (DBP; lower panel) within +/-100kb of the *NPR3* gene.

The x-axis shows genomic position (build hg19) for each variant, and y-axis shows the  $-\log_{10}(\text{p-value})$  for the association. Colour denotes the linkage disequilibrium  $R^2$  with rs1173771, the most likely shared causal variant based on colocalization results.

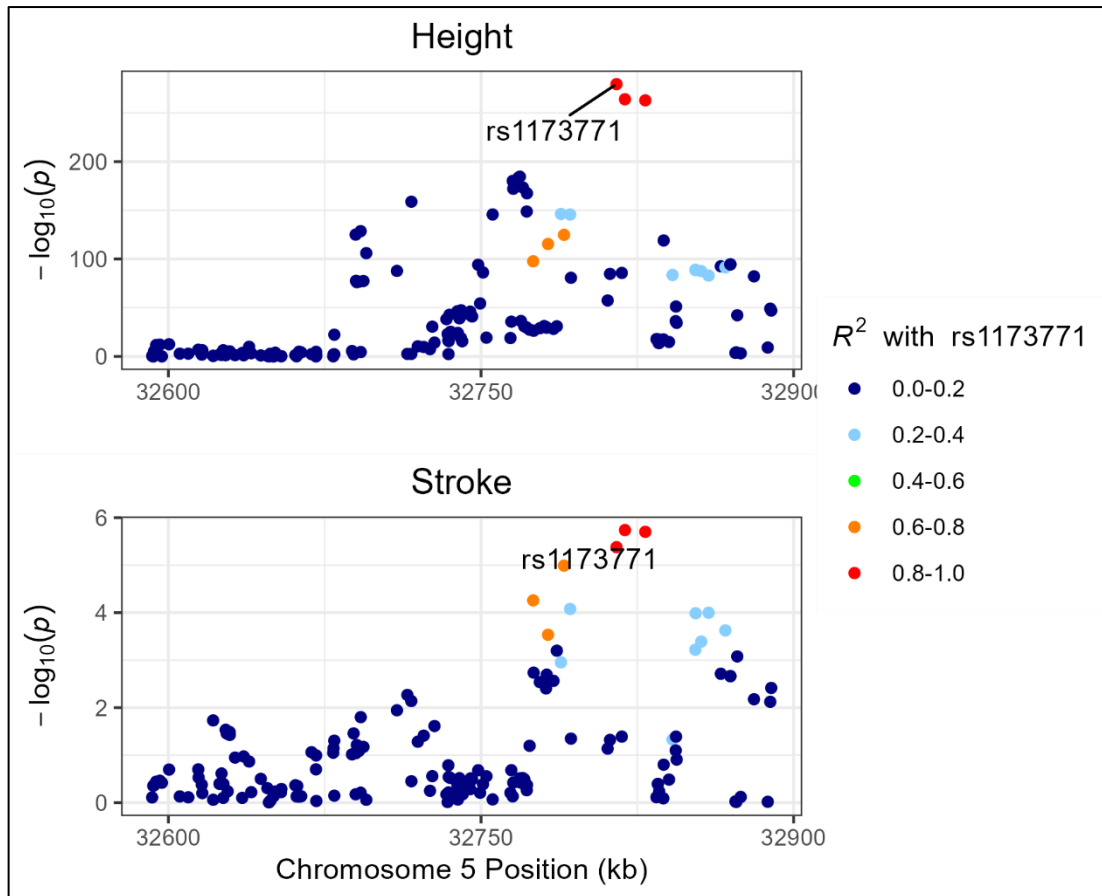

**Fig. S6.** Regional plot of the genetic associations of height (upper panel) and stroke (lower panel) within +/-100kb of the *NPR3* gene.

The x-axis shows genomic position (build hg19) for each variant, and y-axis shows the  $-\log_{10}(p\text{-value})$  for the association. Colour denotes the linkage disequilibrium  $R^2$  with rs1173771, the most likely shared causal variant based on colocalization results.

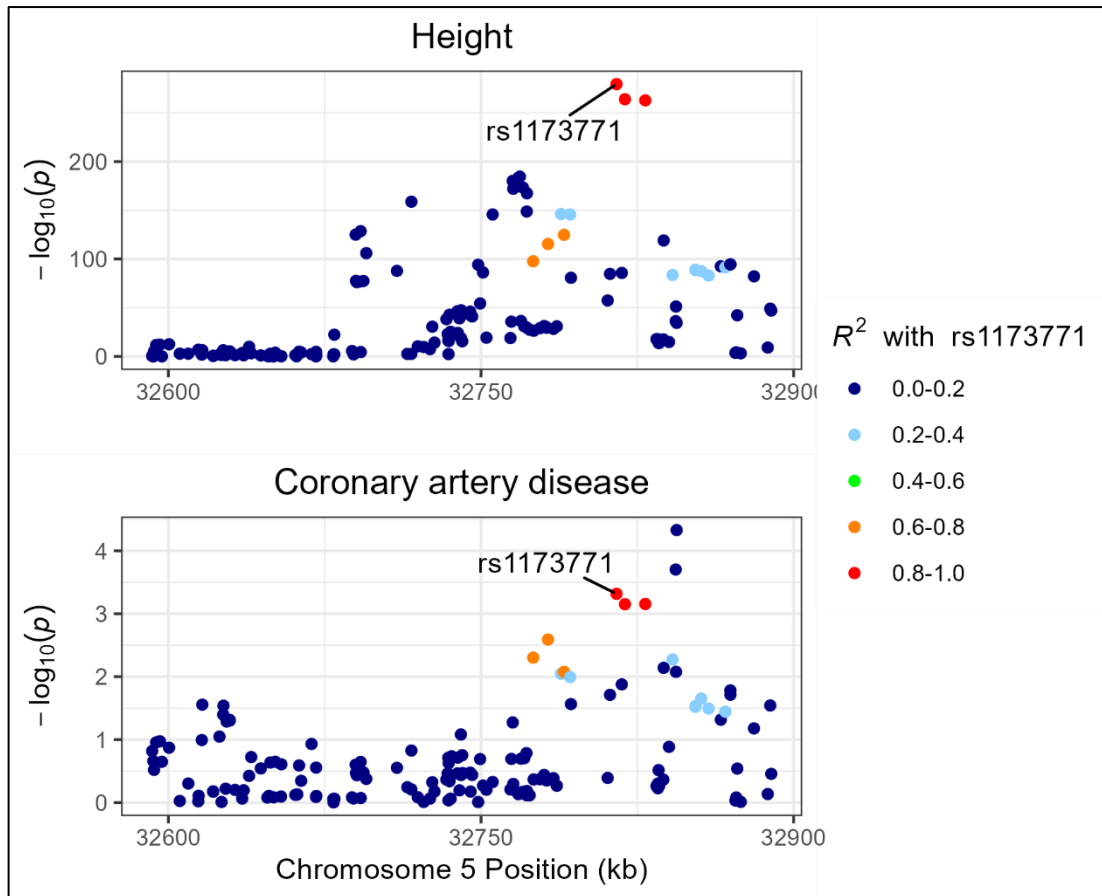

**Fig. S7.** Regional plot of the genetic associations of height (upper panel) and coronary artery disease (lower panel) within +/-100kb of the *NPR3* gene.

The x-axis shows genomic position (build hg19) for each variant, and y-axis shows the  $-\log_{10}(p\text{-value})$  for the association. Colour denotes the linkage disequilibrium  $R^2$  with rs1173771, the most likely shared causal variant based on colocalization results.

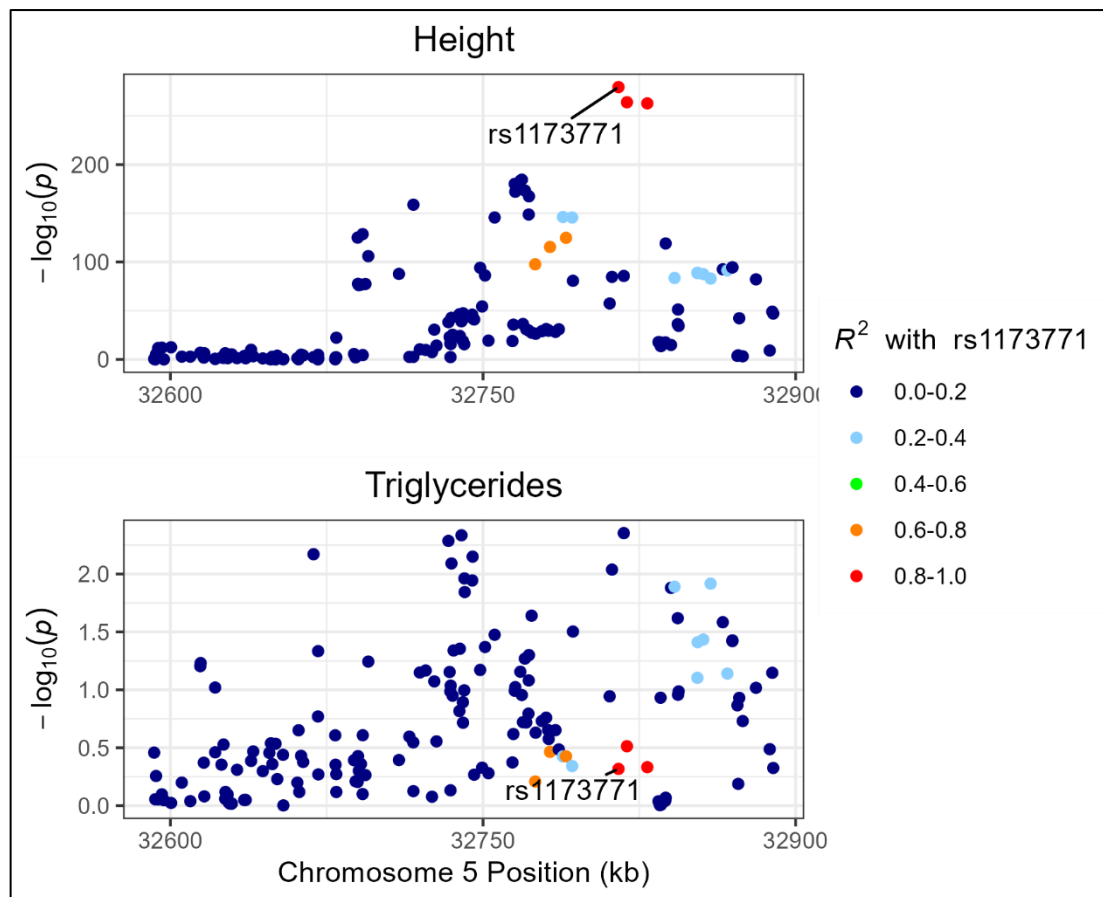

**Fig. S8.** Regional plot of the genetic associations of height (upper panel) and triglycerides (lower panel) within +/-100kb of the *NPR3* gene.

The x-axis shows genomic position (build hg19) for each variant, and y-axis shows the  $-\log_{10}(\text{p-value})$  for the association. Colour denotes the linkage disequilibrium  $R^2$  with rs1173771, the most likely shared causal variant based on colocalization results.



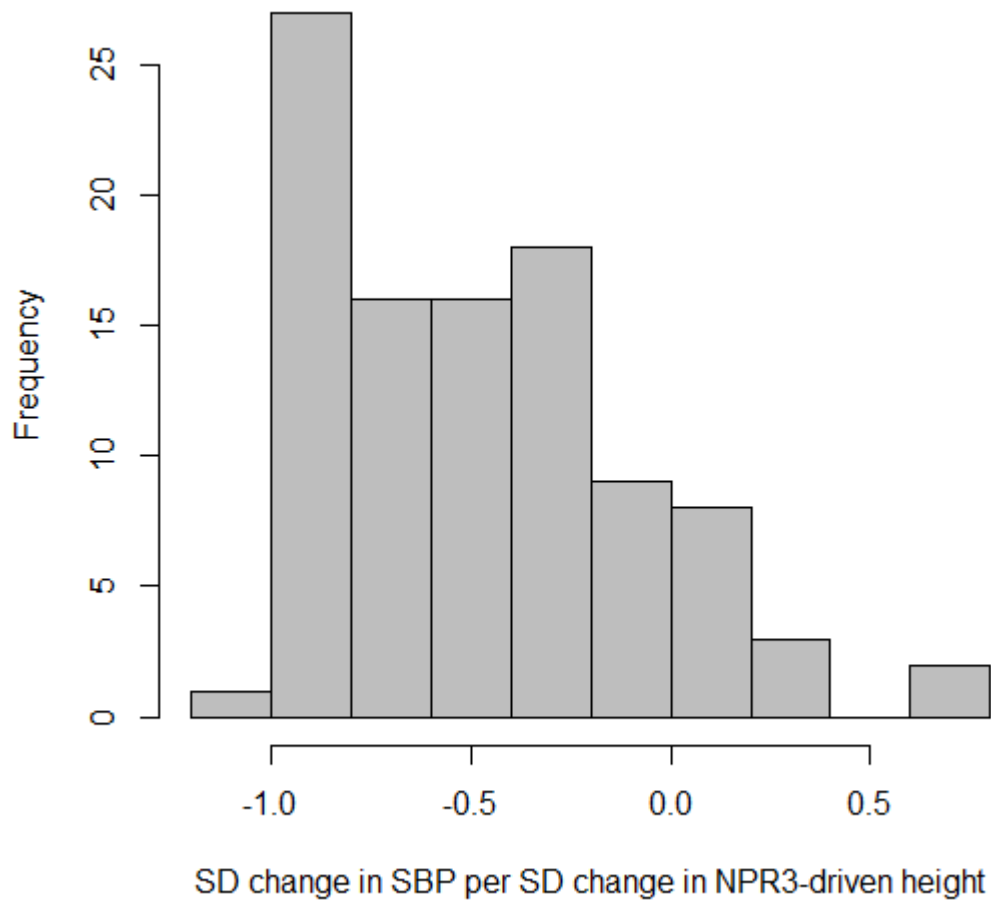

**Fig. S9.** Results of iteratively sampling 4 of the 12 NPR3 variants 100 times and repeating random-effects inverse-variance weighted Mendelian randomization analysis for the outcome of systolic blood pressure.

SBP: systolic blood pressure, SD: standard deviation.

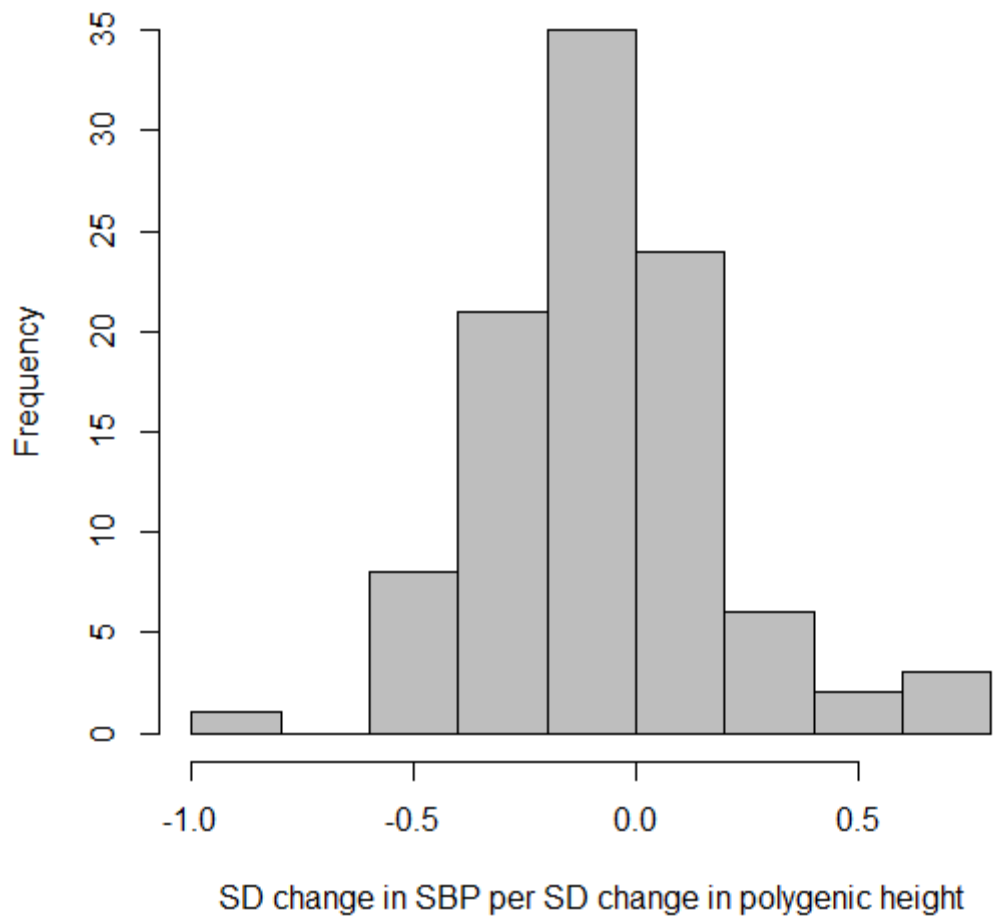

**Fig. S10.** Results of iteratively sampling 4 of the 9,695 height variants from across the genome 100 times and repeating random-effects inverse-variance weighted Mendelian randomization analysis for the outcome of systolic blood pressure.

SBP: systolic blood pressure, SD: standard deviation.

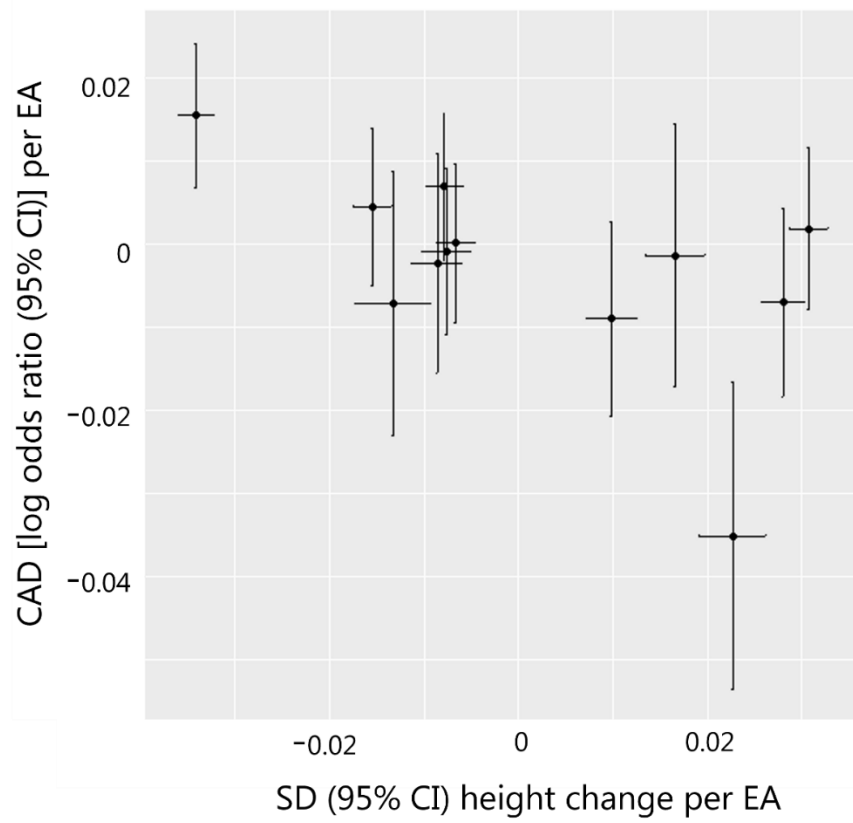

**Fig. S11.** Comparative effects of each of the 12 NPR3 instrumental variables on height (x-axis) and CAD (y-axis).

CAD: coronary artery disease, CI: confidence interval, EA: effect allele, NPR3: natriuretic peptide receptor 3, SD: standard deviation

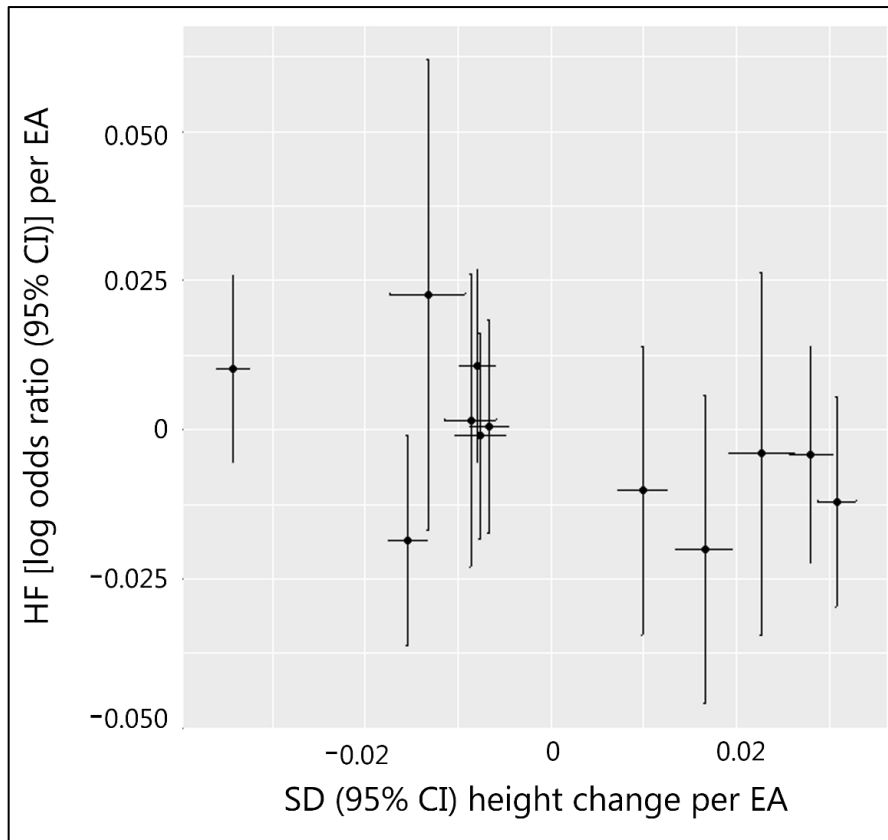

**Fig. S12.** Comparative effects of each of the 12 NPR3 instrumental variables on height (x-axis) and heart failure (y-axis).

CI: confidence interval, EA: effect allele, NPR3: natriuretic peptide receptor 3, SD: standard deviation

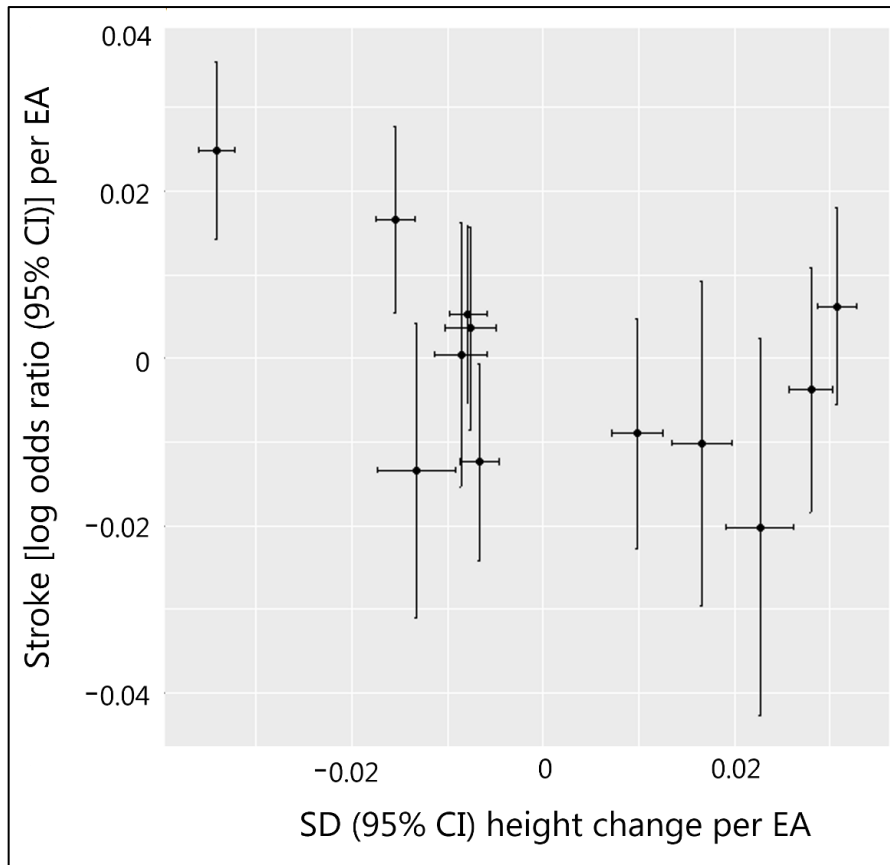

**Fig. S13.** Comparative effects of each of the 12 NPR3 instrumental variables on height (x-axis) and stroke (y-axis).

CI: confidence interval, EA: effect allele, NPR3: natriuretic peptide receptor 3, SD: standard deviation

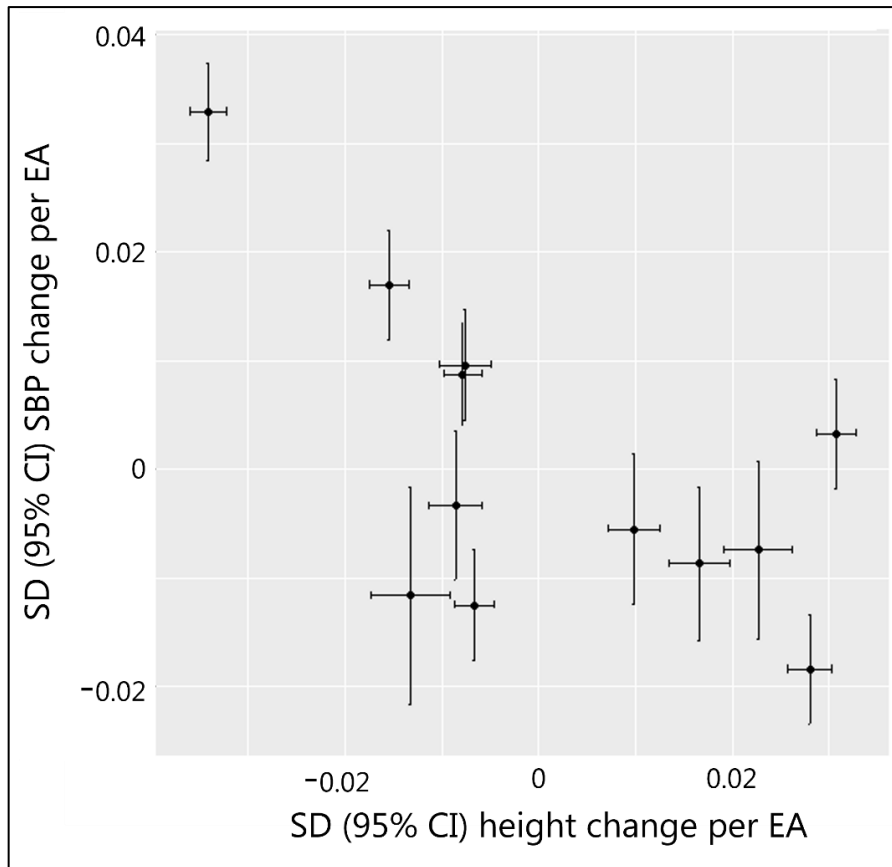

**Fig. S14.** Comparative effects of each of the 12 NPR3 instrumental variables on height (x-axis) and stroke (y-axis).

CI: confidence interval, EA: effect allele, NPR3: natriuretic peptide receptor 3, SBP: systolic blood pressure, SD: standard deviation
